# Supplementary material for: Elevated expression of UBE2T exhibits oncogenic properties in human prostate cancer
Source: PubMed Central journal article supplement (PMC4694827; doi:10.18632/oncotarget.4712), 2015-07-30
Supplement: oncotarget-06-25226-s001.pdf [file oncotarget-06-25226-s001.pdf]

## SUPPLEMENTARY FIGURES

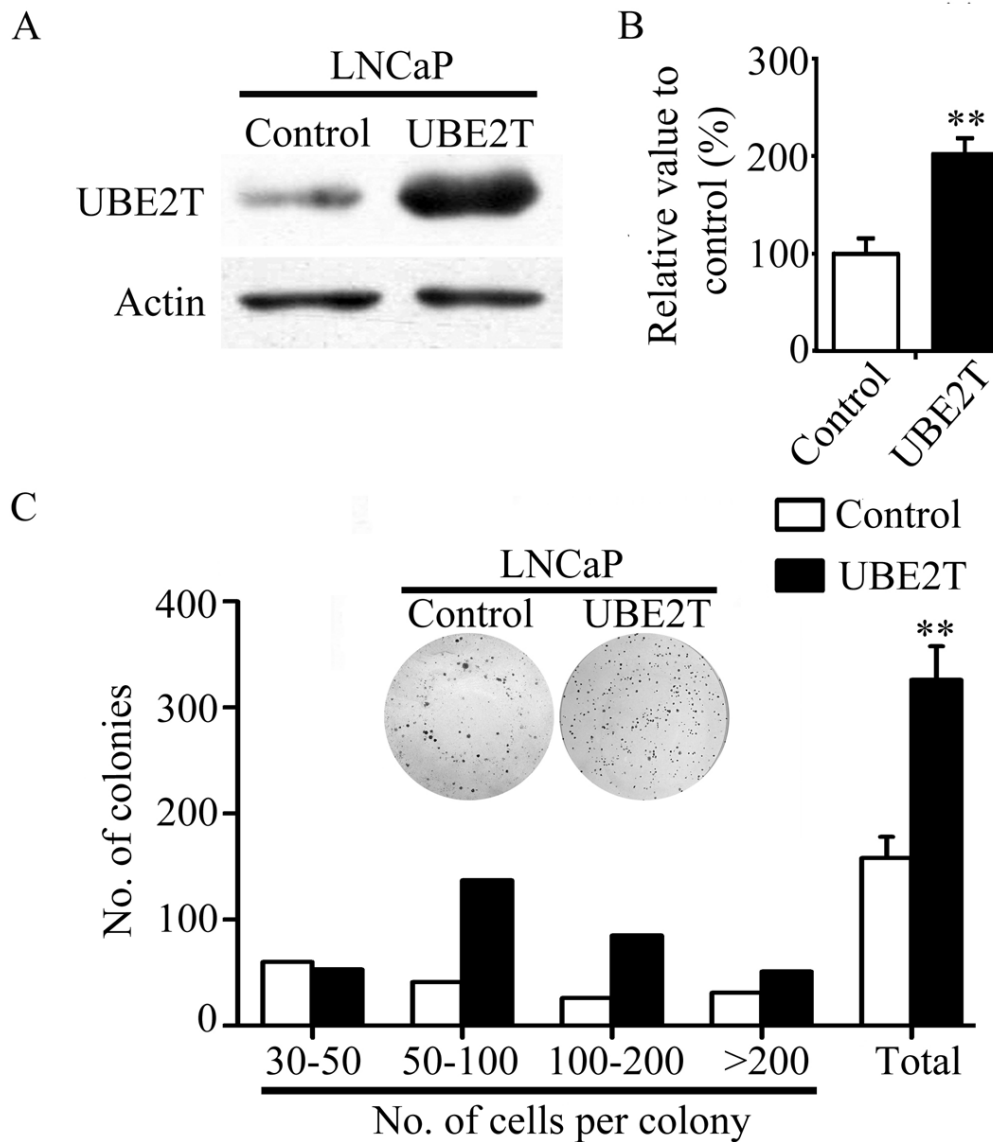

**Supplementary Figure S1: UBE2T promotes proliferation of LNCaP cells.** **A.** Western Blot analysis of UBE2T levels in LNCaP cells overexpressing UBE2T. **B.** MTT assay showed the obviously increased proliferative rate of LNCaP cells with expression of UBE2T. **C.** Colony formation assay demonstrated an increase in the number of clones by overexpression of UBE2T in LNCaP cells. \*\* $P < 0.01$  based on the Student  $t$  test. Error bars, SD.

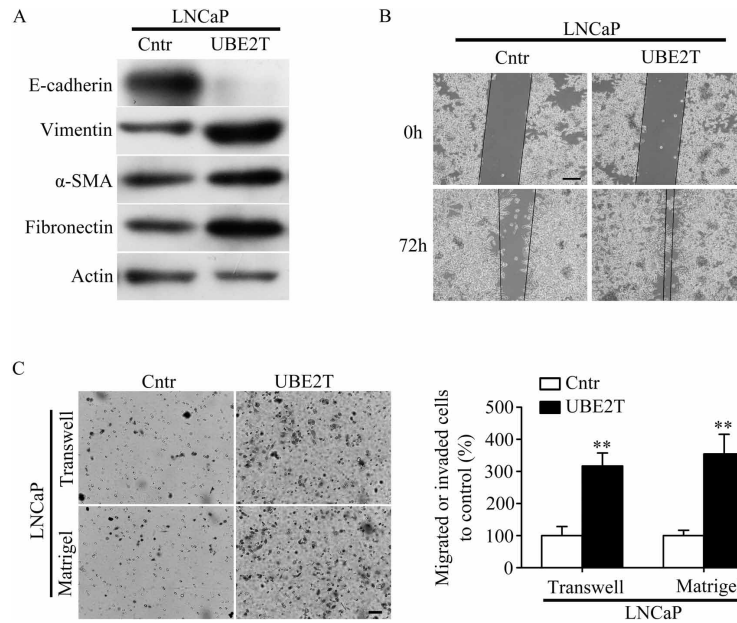

**Supplementary Figure S2: UBE2T promotes migration and invasion of LNCaP cells.** **A.** Western blot analysis of EMT markers in LNCaP cells with overexpression of UBE2T. **B.** Wound healing assay revealed a faster wound healing rate in LNCaP overexpressing UBE2T. **C.** LNCaP cells overexpressing UBE2T possessed more migrating ability in transwell assay and more invading ability in matrigel assay. Scale bars: 100  $\mu$ m (B) and 50  $\mu$ m (C) **\*\*** $P < 0.01$  based on the Student  $t$  test. Error bars, SD.
